# Supplementary material for: Obesity Increases the Severity and Mortality of Influenza and COVID-19: A Systematic Review and Meta-Analysis
Source: PubMed Central journal article supplement (PMC7779975; doi:10.3389/fendo.2020.595109), 2020-12-21

## Supplementary Files

### 1. Subgroup analysis

#### 1.1 subgroup analysis on the obesity and influenza infection.

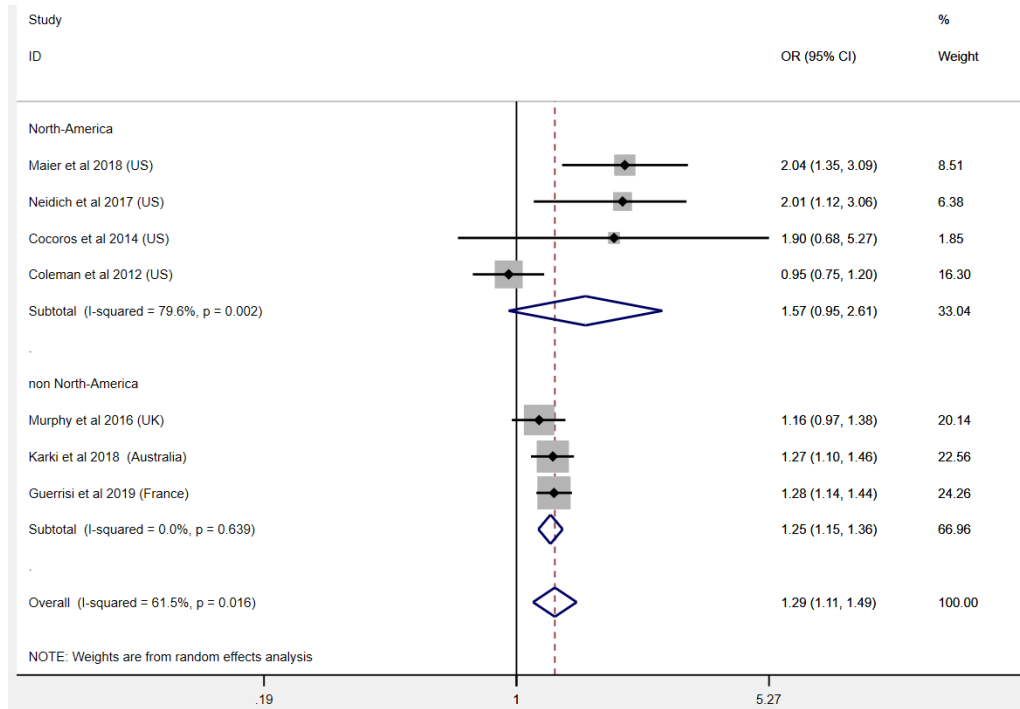

#### 1.2 subgroup analysis on the obesity and influenza hospitalization

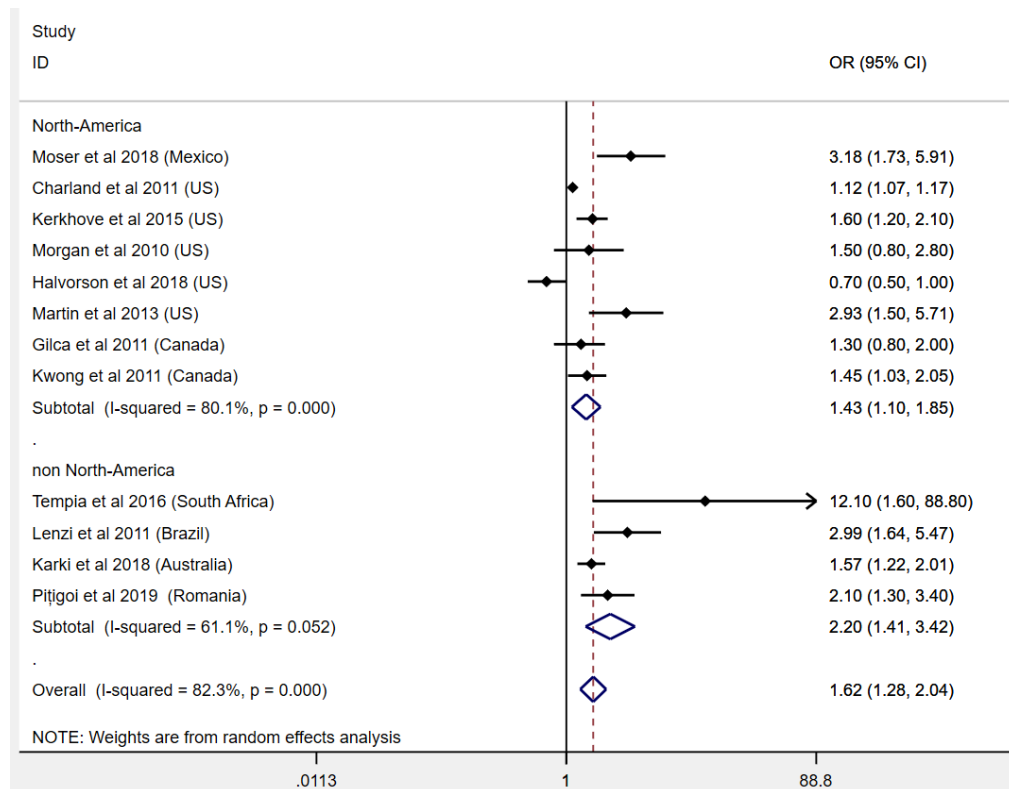

### 1.3 subgroup analysis on the obesity and severity of influenza and admission to ICU.

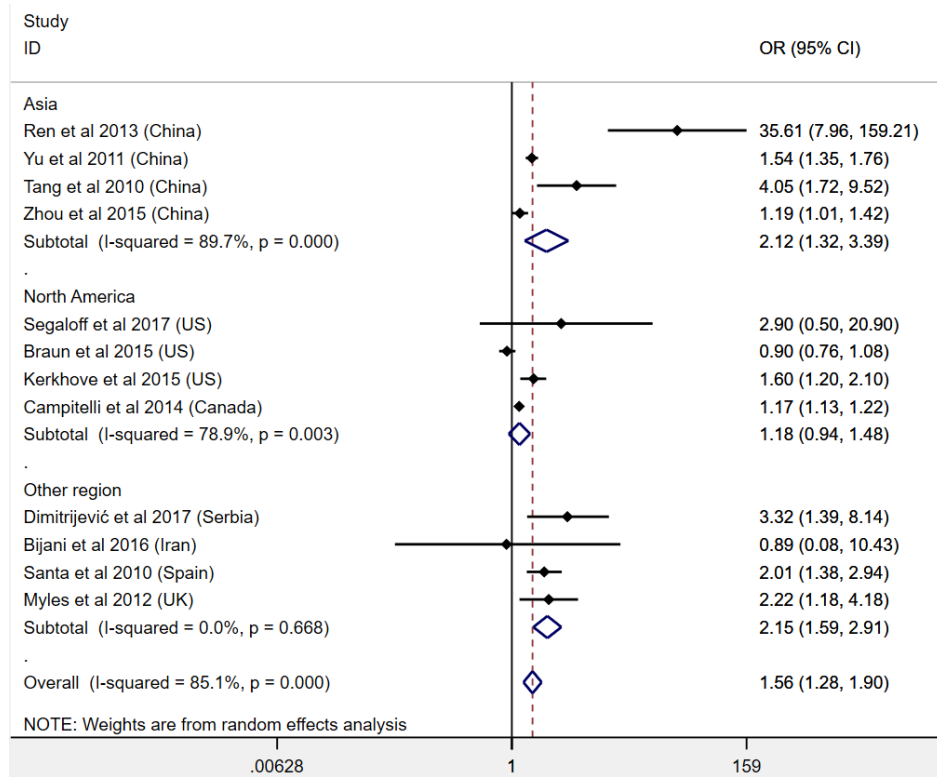

### 1.4 subgroup analysis on the obesity and mortality of influenza

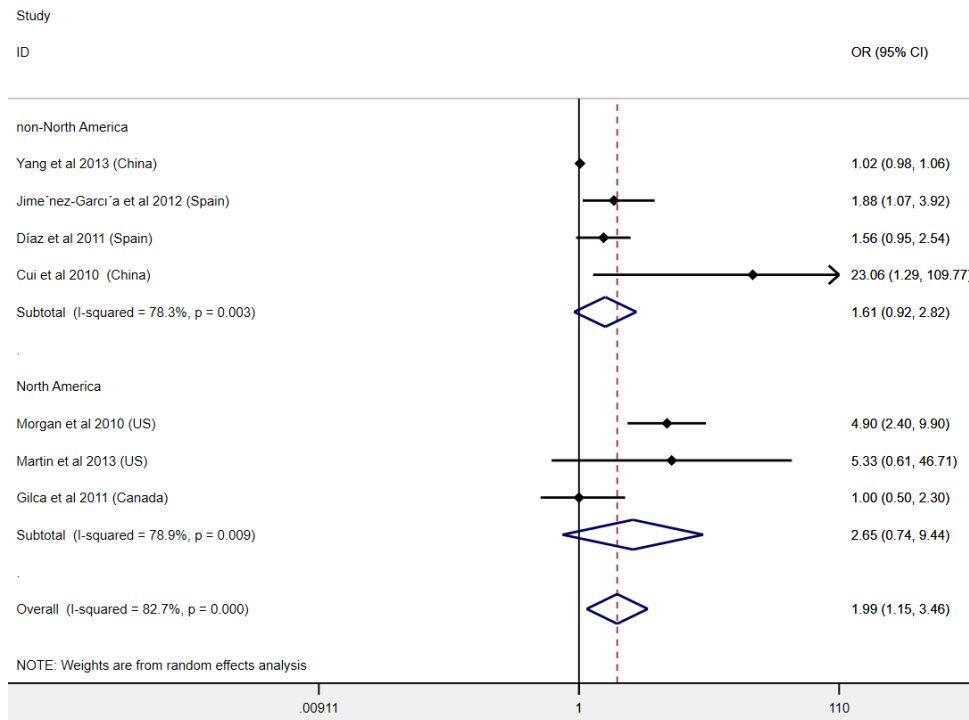

## 2. Publication bias assessment by Begg's test

| Content                               | P value for Begg's test |
|---------------------------------------|-------------------------|
| Obesity and Influenza Risk            | 1.00                    |
| Obesity and Influenza Hospitalization | 0.12                    |
| Obesity and severe outcome            | 0.174                   |
| Obesity and morality                  | 0.533                   |
| Morbid obesity and severe outcome     | 1.00                    |

## 3. Sensitivity analysis

### 3.1 Sensitivity analysis on the obesity and influenza risk

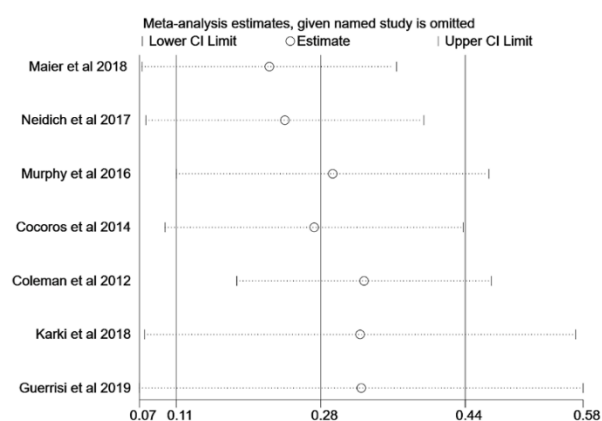

### 2.2 Sensitivity analysis on the obesity and influenza hospitalization

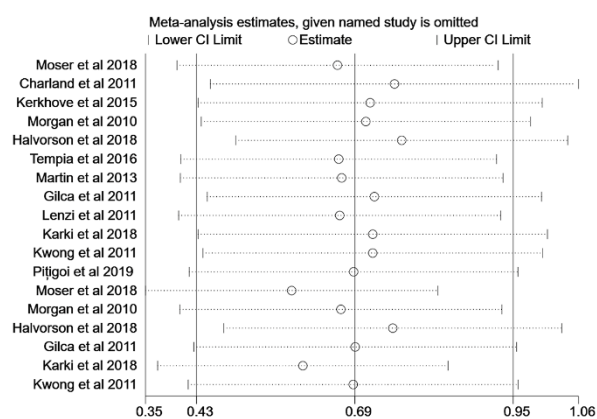

### 2.3 Sensitivity analysis on the obesity and influenza severity

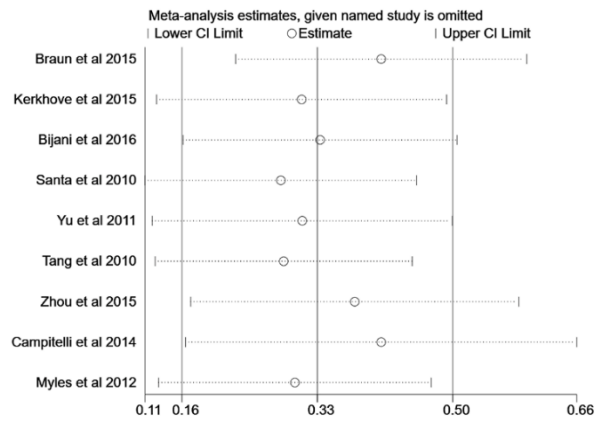

### 2.4 Sensitivity analysis on the obesity and COVID-19 severity

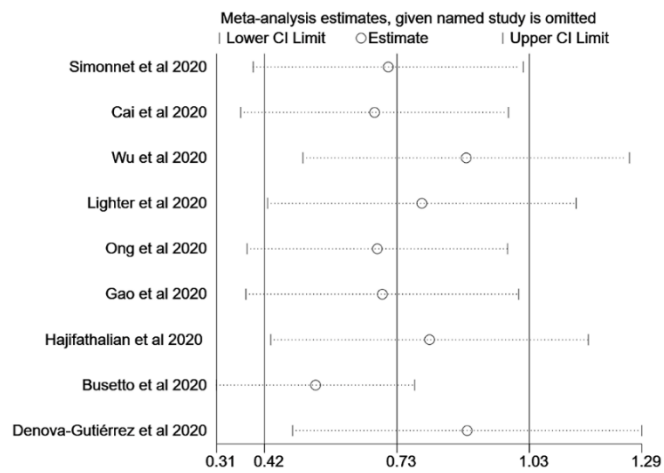

### 2.5 Sensitivity analysis on the obesity and COVID-19 death

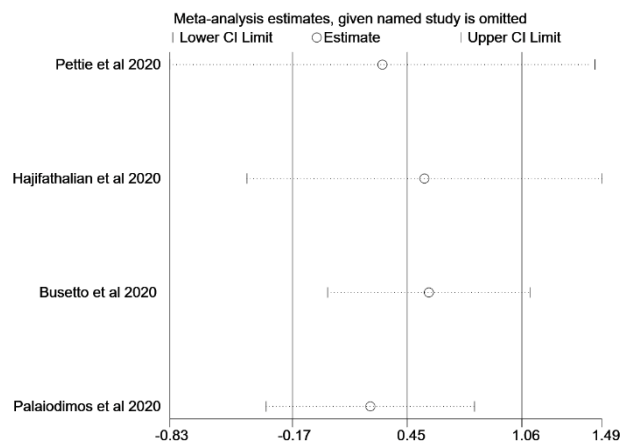

## 2.6 Sensitivity analysis on the obesity and influence death

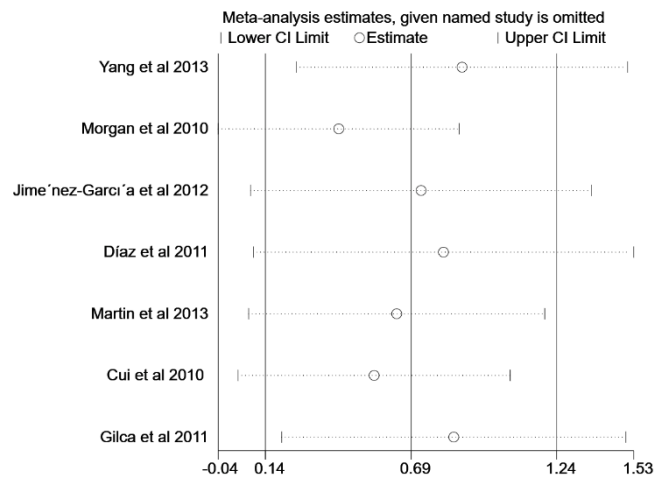

## 2.7 Sensitivity analysis on the morbid obesity and severity, mortality of influenza

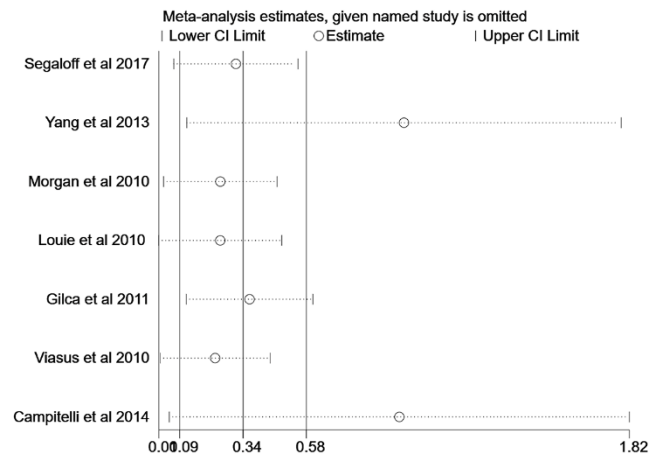

## 2.8 Sensitivity analysis on the morbid obesity and severity, mortality of COVID-19

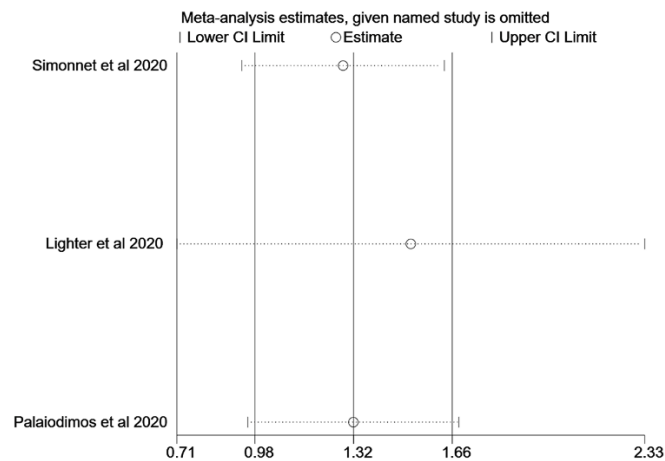

Supplement: DataSheet_1.pdf [file DataSheet_1.pdf]
